# Supplementary material for: Cohort profile: cerebral palsy in the Norwegian and Danish birth cohorts (MOBAND-CP)
Source: PubMed Central journal article supplement — BMJ Open. 2016 Sep 2;6(9):e012777. doi: 10.1136/bmjopen-2016-012777 (PMC5020679; doi:10.1136/bmjopen-2016-012777), 2016-09-02
Supplement: bmjopen-2016-012777supp_table.pdf [file bmjopen-2016-012777supp_table.pdf]

**Supplementary Table. Variables harmonized as of May 2016**

| <b>Variables</b>                          | <b>Descriptions and details</b>                                | <b>Data source Denmark<br/>(missing, n (%))</b> | <b>Data source Norway<br/>(missing, n (%))</b> |
|-------------------------------------------|----------------------------------------------------------------|-------------------------------------------------|------------------------------------------------|
| <i>Maternal Characteristics</i>           |                                                                |                                                 |                                                |
| Maternal age                              | Age at birth                                                   | Key_DNBC (85 (0.0))                             | MBRN (0 (0.0))                                 |
| Previous live births                      | 0,1,2,3,4 or more                                              | DNBC_all_reproductive_<br>history (86 (0.1))    | MBRN (5476 (4.8))                              |
| Previous stillbirths                      | Stillbirth after 28 weeks completed gestational age (0,1,2).   | DNBC_all_reproductive_<br>history               | MBRN                                           |
| Previous spontaneous abortions            | Spontaneous abortions during pregnancy weeks 5-16 (range 0-10) | Int1 (768 (0.8))                                | Q1 (3431 (3.4))                                |
| Menstrual cycle, regularity               | Regular menstrual cycle. No, yes.                              | Int1(415(0.5))                                  | Q1 (416(0.5))                                  |
| Menarche                                  | Age (in years) at first menstrual period                       | Int1 (4066 (4.5))                               | Q1 (1324 (1.2))                                |
| Pre pregnancy body mass index             | Calculated from pre-pregnancy weight and height                | Int1 (1512 (1.7))                               | Q1 (2807 (2.7))                                |
| Weight gain in pregnancy                  | Reported directly in Demark, calculated in Norway              | Int3 (685 (1.0)))                               | Q1 and Q4 (23 602 (23))                        |
| Maternal occupational status              | Employed, unemployed, student, receiving pension/benefits      | Int1 (40 (0.0))                                 | Q1 (2101 (2.0))                                |
| Marital status                            | Spouse/partner,single                                          | Int1 (65 (0.1))                                 | Q1 (1561 (1.5))                                |
| Planned pregnancy                         | No, yes                                                        | Int1 (53 (0.1))                                 | Q1 (1221 (1.2))                                |
| <i>Paternal characteristics</i>           |                                                                |                                                 |                                                |
| Paternal occupational status              | Employed, unemployed, student, receiving pension/benefits      | Int1 (1912 (2.1))                               | Q1 (2735 (2.7))                                |
| Paternal age                              | ≤19,20-24,25-29,30-34,35-39,40-44,45-49,≥50                    | MBRD (1927 (1.9))                               | MBRN (552 (0.5))                               |
| Paternal BMI                              | Calculated from maternal report of father's weight and height  | Int3 (3142 (4.7))                               | Q1 (4708 (4.6))                                |
| <i>Exposures during pregnancy</i>         |                                                                |                                                 |                                                |
| In vitro fertilization                    | No, yes                                                        | Danish IVF registry                             | MBRN and Q1                                    |
| Maternal smoking up till Int1/Q1*         | No, yes, stopped                                               | Int1 (60 (0.1))                                 | Q1 (653 (0.6))                                 |
| Cigarettes daily at Int1/Q1*              | Range 0-50                                                     | Int1 (137 (0.1))                                | Q1 (815 (0.8))                                 |
| Maternal alcohol intake before pregnancy* | in units per week, range 0-65                                  | Int1 (443 (0.4))                                | Q1 (2557 (2.5))                                |
| Binge drinking up til Int1/Q1*            | Number of episodes of binge drinking (five or more drinks      | Int1 (371 (0.4))                                | Q1 (6298 (6.2))                                |

|                                                     |                                                                                              |                            |                        |
|-----------------------------------------------------|----------------------------------------------------------------------------------------------|----------------------------|------------------------|
| Daily cups of coffee at Int1/Q1*                    | in one sitting). 0, 1-2, ≥3<br>Range 0-69                                                    | Int1 (60 (0.0))            | Q1 (4 (0.0))           |
| Daily cups of tea at Int1/Q1*                       | Range 0-48                                                                                   | Int1 (59 (0.0))            | Q1 (12 (0.0))          |
| Daily intake of caffeinated soft drinks at Int1/Q1* | <1 L, ≥1 L                                                                                   | Int1 (75 (0.1))            | Q1 (10 (0.0))          |
| Daily intake of caffeine at Int1/Q1*                | Calculated total from caffeinated beverages (in mg)                                          | Int1 (129 (0.1))           | Q1 (15 (0.0))          |
| Illicit drug use in pregnancy                       | No, yes. If not reported in MoBa, recorded as no, therefore no missing values                | Int2 (56 (0.1))            | Q1 and Q3 (0 (0.0))    |
| Folate/folic acid intake weeks 0-30                 | No, yes.                                                                                     | Int1 and Int2 (9181 (9.5)) | Q1 and Q3 (3204 (3.1)) |
| Multivitamin intake up till Int1/Q1*                | No, yes.                                                                                     | Int1 (2751 (3.0))          | Q1 (1673 (1.6))        |
| Physical activity up till Int1/Q1                   | No exercise, once a week, twice a week, ≥3 times per week (aerobics, jogging, cycling, etc). | Int1 (57 (0.1))            | Q1 (3588 (3.5))        |
| <i>Maternal medical conditions during pregnancy</i> |                                                                                              |                            |                        |
| Nausea during pregnancy weeks 0-12*                 | No, nausea, vomiting.                                                                        | Int2 (104 (0.1))           | Q1 (493 (0.5))         |
| Hyperemesis                                         | Hospitalized for hyperemesis gravidarum. No, yes.                                            | LPR (0 (0.0))              | Q3 (0 (0.0))           |
| Urinary tract infections up till Int1/Q1*           | No, yes.                                                                                     | Int1 526 (0.6))            | Q1 (0 (0.0))           |
| Rheumatoid arthritis                                | Diagnosed before birth.                                                                      | LPR (0 (0.0))              | MBRN (0 (0.0))         |
| Joint problems in pregnancy                         | No, yes.                                                                                     | Int1(194 (0.2))            | Q1 (0 (0.0))           |
| Thyroid disorders                                   | Hyper- or hypothyroidism. No, yes                                                            | Int1 (183 (0.2))           | Q1 (0 (0.0))           |
| Ovarian cysts                                       | Before or during pregnancy. No, yes.                                                         | Int1 (1835(0.2))           | Q1 (0 (0.0))           |
| Epilepsy in pregnancy                               | No, yes.                                                                                     | Int2 (109 (0.1))           | Q1(0 (0.0))            |
| Diabetes                                            | Diagnosed before delivery. No, type I, type II, other/ unspecified, gestational              | LPR (0 (0.0))              | MBRN (0 (0.0))         |
| Thrombosis                                          | Diagnosed during pregnancy. No, yes.                                                         | LPR (0 (0.0))              | MBRN (0 (0.0))         |
| Vaginal bleeding up till Int1/Q1*                   | No, yes.                                                                                     | Int1 (110 (0.1))           | Q1 (869 (0.8))         |
| Respiratory infection during weeks 0-12*            | No, yes.                                                                                     | Int1 and Int2 (1776 (1.8)) | Q1 (1502 (1.4))        |
| Fever during weeks 0-12*                            | No, yes.                                                                                     | Int1 and Int2 (1800 (1.9)) | Q1 (2614 (2.5))        |
| Preeclampsia                                        | No, light, serious, unspecified.                                                             | MBRD (138 (0.1))           | MBRN (0 (0.0))         |
| Eclampsia                                           | No, yes.                                                                                     | MBRD (138 (0.1))           | MBRN (0 (0.0))         |
| HELLP syndrome                                      | No, yes.                                                                                     | MBRD (138 (0.1))           | MBRN (0 (0.0))         |
| Chorioamnionitis                                    | No, yes.                                                                                     | LPR (0 (0.0))              | MBRN (0 (0.0))         |
| Sepsis during labor                                 | No, yes.                                                                                     | LPR (0 (0.0))              | MBRN (0 (0.0))         |

|                                                        |                                                                                                                                     |                       |                   |
|--------------------------------------------------------|-------------------------------------------------------------------------------------------------------------------------------------|-----------------------|-------------------|
| <i>Labour and delivery</i>                             |                                                                                                                                     |                       |                   |
| Prolonged rupture of membranes                         | Rupture of membranes ≥24 hours before delivery. No, yes.                                                                            | Int3 (574 (0.8))      | MBRN (0 (0.0))    |
| Fever in labor                                         | No, yes.                                                                                                                            | LPR (0 (0.0))         | MBRN (0 (0.0))    |
| Dystocia                                               | No, yes.                                                                                                                            | LPR (0 (0.0))         | MBRN (0 (0.0))    |
| Placental abruption                                    | No, yes.                                                                                                                            | MBRD (139 (0.1))      | MBRN (0 (0.0))    |
| Presentation                                           | Cephalic, breech, transverse, unspecified.                                                                                          | MBRD (563 (0.6))      | MBRN (1151 (1.0)) |
| Caesarean section                                      | No, elective, emergency, unspecified.                                                                                               | MBRD (446 (0.5))      | MBRN (0 (0.0))    |
| Forceps                                                | No, yes.                                                                                                                            | MBRD (446 (0.5))      | MBRN (0 (0.0))    |
| Vacuum                                                 | No, yes.                                                                                                                            | MBRD (446 (0.5))      | MBRN (0 (0.0))    |
| <i>Birth outcomes</i>                                  |                                                                                                                                     |                       |                   |
| Birth year                                             | Year of birth. Range 1996-2009.                                                                                                     | Key_DNBC (85 (0.1))   | MBRN (0 (0.0))    |
| Outcome                                                | The child's condition at delivery. Live born, stillborn, spontaneous abortion, induced abortion, other.                             | Key_DNBC (0 (0.0))    | MBRN (0 (0.0))    |
| Sex                                                    | Male, female.                                                                                                                       | Key_DNBC (5693 (5.5)) | MBRN (213 (0.2))  |
| Plurality                                              | Number of fetuses in pregnancy. Range 0 (abortion) – 4.                                                                             | Key_DNBC (0 (0.0))    | MBRN (0 (0.0))    |
| Birth order (for plural births)                        | Range 0 (abortion) – 3.                                                                                                             | Key_DNBC (0 (0.0))    | MBRN (0 (0.0))    |
| Apgar-score                                            | At five minutes.                                                                                                                    | MBRD (895 (0.9))      | MBRN (488 (0.4))  |
| Birth weight                                           | In grams.                                                                                                                           | MBRD (473 (0.5))      | MBRN (261 (0.2))  |
| Gestational age , last menstrual period                | In days.                                                                                                                            | Key_DNBC (85 (0.0))   | MBRN (6054 (5.3)) |
| Gestational age, ultrasound (or last menstrual period) | In days. Based on last menstrual period if ultrasound is missing.                                                                   | Key_DNBC (87 (0.0))   | MBRN (518 (0.4))  |
| Birth defects, all                                     | Any birth defect. No, yes.                                                                                                          | MBRD (1 (0.0))        | MBRN (0 (0.0))    |
| Birth defects, serious                                 | Serious birth defect, as defined by the birth registries. No, yes.                                                                  | MBRD (139 (0.1))      | MBRN (0 (0.0))    |
| Specific birth defects                                 | According to ICD-10 (Q00, Q01, Q02, Q03, Q04, Q05, Q06, Q07, Q1, Q2, Q30-34, Q35-37, Q38-Q45, Q5, Q60-64, Q65-79, Q8, Q9). No, yes. | LPR (0 (0.0))         | MBRN (0 (0.0))    |
| Infant death                                           | Death during first year of life. No, yes.                                                                                           | Key_DNBC (5693 (5.6)) | MBRN (993 (0.8))  |
| <i>Clinical condition of newborn</i>                   |                                                                                                                                     |                       |                   |
| Transfer to NICU                                       | No, yes.                                                                                                                            | MBRD (138 (0.1))      | MBRN (0 (0.0))    |
| Ventilator treatment                                   | CPAP or respirator treatment. No, yes.                                                                                              | MBRD (138 (0.1))      | MBRN (0 (0.0))    |
| Neonatal encephalopathy                                | No, cerebral irritability, cerebral depression, cerebral coma                                                                       | LPR (0 (0.0))         | MBRN (0 (0.0))    |
| Intracranial bleeding                                  | No, yes.                                                                                                                            | LPR (0 (0.0))         | MBRN (0 (0.0))    |
| Icterus                                                | No, yes                                                                                                                             | Int3 (40 (0.1))       | MBRN (0 (0.0))    |

|                           |                                                                                |                   |                 |
|---------------------------|--------------------------------------------------------------------------------|-------------------|-----------------|
| Neonatal seizures         | No, yes.                                                                       | LPR (0 (0.0))     | MBRN (0 (0.0))  |
| <i>Cerebral palsy</i>     |                                                                                |                   |                 |
| CP                        | No, yes.                                                                       | CPRD (0 (0.0))    | CPRN (0 (0.0))  |
| CP subtype                | No, spastic unilateral, spastic bilateral, dyskinetic, ataxic, not classified. | CPRD (0 (0.0))    | CPRN (0 (0.0))  |
| Gross motor function      | Gross motor function classification scale level at age 5 years. Range I-V,     | CPRD (1 (0.5))    | CPRN (11 (4.5)) |
| Age at CP diagnosis       | In completed months. Range 0-93.                                               | CPRD (0 (0.0))    | CPRN (0 (0.0))  |
| CP with epilepsy          | No, yes, not CP.                                                               | CPRD (1 (0.5))    | CPRN (32 (13))  |
| CP with visual impairment | No, yes, not CP.                                                               | CPRD (10 (5.2))   | CPRN (57 (23))  |
| CP with mental impairment | No, yes, not CP.                                                               | CPRD (4 (2.1))    | CPRN (86 (35))  |
| <i>General</i>            |                                                                                |                   |                 |
| Response time*            | Gestational age in days when mother answered Int1/Q1.                          | Key_DNBC and Int1 | MBRN and Q1     |

Key\_DNBC, data from the Medical Birth Registry of Denmark or the Danish Civil Registration System – cleaned by DNBC;  
 DNBC\_all\_reproductive\_history, data from the Medical Birth Registry of Denmark – cleaned by DNBC; LPR, The Danish Patient Registry; Int, DNBC Interview; Q, MoBa questionnaire; CPRD, CP Registry of Denmark; CPRN, CP registry of Norway; MBRD, Medical Birth Registry of Denmark; MBRN, Medical Birth Registry of Norway.

\*similar variables also harmonized for later time points in pregnancy

For many variables, it was not possible to distinguish between missing and 0/no. Therefore, there are no missing values for many variables.
